# Supplementary material
Source: Springer Nature journal article supplement (https://www.springermedizin.de/resource/supplementary/12979_2008_50_MOESM1_ESM.pdf/9603284)

Figure 1

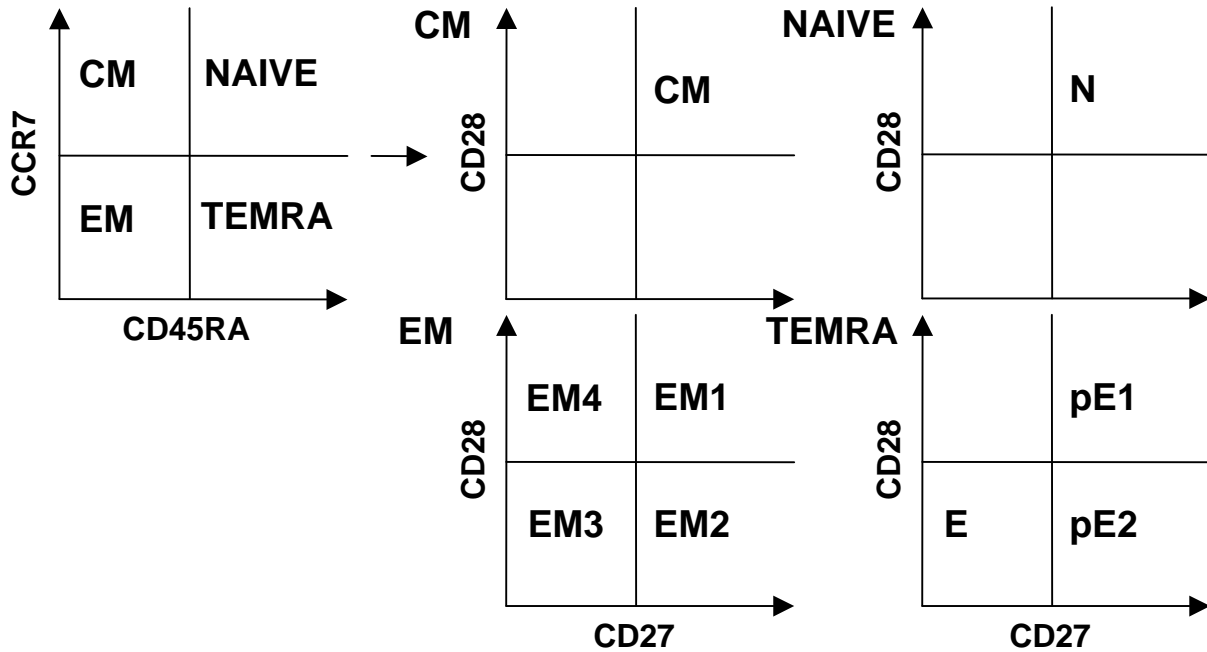

Supplement: MOESM1 [file 9603284]
